# Supplementary material for: Development and Characterization of an Ex Vivo Testing Platform for Evaluating Automated Central Vascular Access Device Performance
Source: MDPI journal article supplement (doi:10.3390/jpm12081287), 2022-08-05
Supplement: s1 [file s1]

## Supplementary Information

**Supplementary Table S1.** Summary of Device Specific Criteria. Note these were not evaluated in this manuscript as they are device specific, and likely independent of the model being used.

| Device Specific Criteria                                      |
|---------------------------------------------------------------|
| Failure detection                                             |
| Scan breadth                                                  |
| Catheter size/needle gauge compatibility                      |
| Provisions for sanitation of device and patient               |
| Dislodgement detection                                        |
| Auto-tuning of probe or other sensors                         |
| Guidewire guidance                                            |
| Training time recommended by vendor                           |
| Average time to attach and activate system                    |
| Personnel proficiency at different experience/training levels |
| Ingress Protection Rating                                     |
| Light emission                                                |
| Patient movement/vibration                                    |
| Noise produced                                                |
| Ambient temperature                                           |
| Atmospheric pressure                                          |
| Battery life                                                  |
| Overall device footprint                                      |
| Weight                                                        |
